# Supplementary material for: Potential Treatment of Lysosomal Storage Disease through Modulation of the Mitochondrial—Lysosomal Axis
Source: MDPI journal article supplement (doi:10.3390/cells10020420), 2021-02-17
Supplement: s1 [file s1]

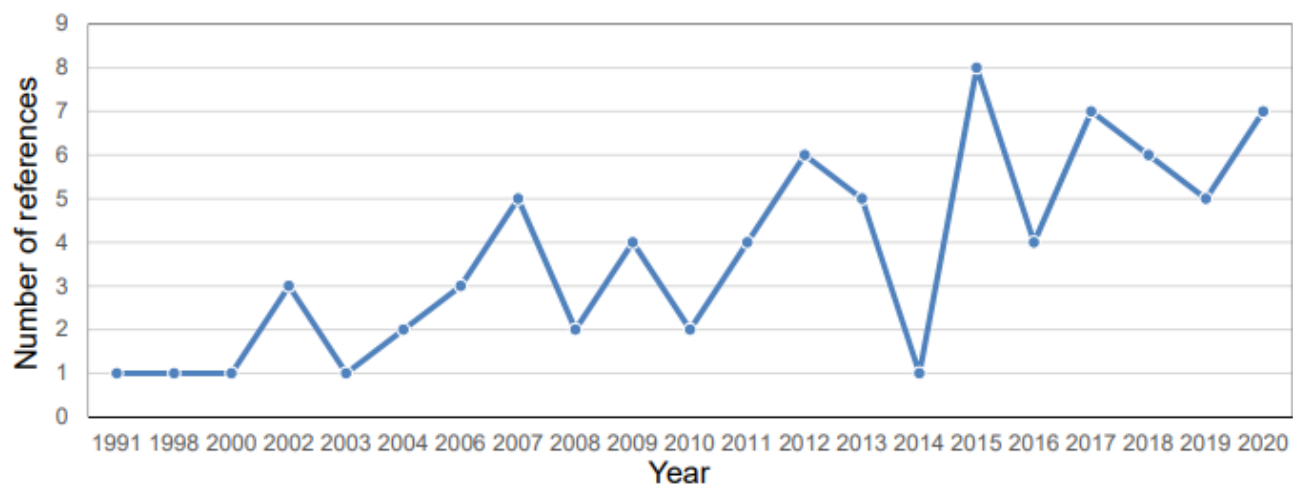

**Figure S1.** Information on the year of publication of research papers referenced in this review. 47% of the references have been published since 2015, indicating that this review article is up to date.
